# Supplementary material
Source: PubMed Central journal article supplement (PMC4339610)
Supplement: NIHMS596132-supplement-Supplementary_Table_1.pdf [file NIHMS596132-supplement-Supplementary_Table_1.pdf]

**Supplementary Table 1 Eudemonic wellbeing and mortality in the complete sample, proportional hazards model including all covariates (Model 5 in table 1)**

| Factor                                    | Adjusted hazard ratio (95% C.I.) | P     |
|-------------------------------------------|----------------------------------|-------|
| Eudemonic wellbeing quartile              |                                  |       |
| 1 (lowest)                                | 1                                |       |
| 2                                         | 0.780 (0.683 - 0.891)            | 0.001 |
| 3                                         | 0.805 (0.688 - 0.942)            | 0.007 |
| 4 (highest)                               | 0.697 (0.583 - 0.833)            | 0.001 |
| Age                                       |                                  |       |
| 50-59                                     | 1                                |       |
| 60-69                                     | 2.000 (1.588 - 2.516)            | 0.001 |
| 70-79                                     | 5.235 (4.145 - 6.612)            | 0.001 |
| 80+                                       | 12.551 (9.847 - 16.00)           | 0.001 |
| Gender (female)                           | 0.568 (0.510 - 0.632)            | 0.001 |
| Wealth                                    |                                  |       |
| 1 (lowest)                                | 1 (reference)                    |       |
| 2                                         | 0.965 (0.834 - 1.115)            | 0.63  |
| 3                                         | 0.792 (0.674 - 0.932)            | 0.005 |
| 4                                         | 0.826 (0.701 - 0.974)            | 0.023 |
| 5 (highest)                               | 0.739 (0.614 - 0.889)            | 0.001 |
| Education                                 |                                  |       |
| Lower                                     | 1 (reference)                    |       |
| Intermediate                              | 1.042 (0.889 - 1.222)            | 0.61  |
| Higher                                    | 0.937 (0.797 - 1.102)            | 0.43  |
| Marital status (unmarried)                | 1.146 (1.023 - 1.284)            | 0.018 |
| Employment (not in paid employment)       | 1.725 (1.361 - 2.185)            | 0.001 |
| Ethnicity (minority status)               | 0.619 (0.357- 1.071)             | 0.086 |
| Depressive illness (past two years)       | 0.938 (0.715 - 1.229)            | 0.64  |
| Depression (elevated CES-D)               | 1.050 (0.929 - 1.186)            | 0.44  |
| Limiting longstanding illness at baseline | 1.207 (1.073 - 1.357)            | 0.002 |
| Cancer at baseline                        | 1.808 (1.543 - 2.120)            | 0.001 |
| CHD at baseline                           | 1.132 (0.997 - 1.285)            | 0.055 |
| Diabetes at baseline                      | 1.294 (1.102 - 1.519)            | 0.002 |
| Heart failure at baseline                 | 1.743 (1.222 - 2.486)            | 0.002 |
| Stroke at baseline                        | 1.268 (1.068 - 1.506)            | 0.007 |
| Chronic lung disease at baseline          | 1.389 (1.190 - 1.621)            | 0.001 |
| Smoking                                   | 1.593 (1.388 - 1.822)            | 0.001 |

---

| <b>Factor</b>                             | <b>Adjusted hazard ratio (95% C.I.)</b> | <b><i>P</i></b> |
|-------------------------------------------|-----------------------------------------|-----------------|
| Alcohol at least daily                    | 1.072 (0.955 – 1.204)                   | 0.24            |
| No vigorous or moderate physical activity | 1.453 (1.298 – 1.626)                   | 0.001           |

---
